# Supplementary material
Source: publisher figshare collection journal article supplement (https://sage.figshare.com/ndownloader/files/13877858)

## Appendix A.

**Table 1A.** Physical Characteristics and Physical Activity Measured by IPAQ-SF and Accelerometer.

| Characteristics                  | Mean ( <i>SD</i> ) |
|----------------------------------|--------------------|
| Age (years)                      | 58.25 (5.45)       |
| Weight (kg)                      | 58.78 (8.58)       |
| Height (cm)                      | 159.97 (7.31)      |
| Body mass index                  | 22.92 (2.60)       |
| IPAQ-SF                          |                    |
| Vigorous (min/day)               | 4.66 (22.97)       |
| Moderate (min/day)               | 31.87 (40.08)      |
| Moderate + Vigorous (min/day)    | 36.54 (51.73)      |
| Walking (min/day)                | 51.73 (40.07)      |
| Total time in activity (min/day) | 95.29 (83.55)      |
| Total activity (MET-min/day)     | 358.71 (357.2)     |
| Sitting weekdays (min/day)       | 538.19 (146.80)    |
| Sitting weekend (min/day)        | 548.46 (166.97)    |
| Accelerometer                    |                    |
| Vigorous (min/day)               | 0.52 (1.03)        |
| Moderate (min/day)               | 35.29 (22.96)      |
| Moderate to vigorous (min/day)   | 35.84 (23.28)      |

|                     |                   |
|---------------------|-------------------|
| Sedentary (min/day) | 642.35 (99.50)    |
| Steps (per day)     | 6003.87 (2791.12) |

*Note.*  $n = 240$ . IPAQ-SF = International Physical Activity Questionnaire–Short form.

#### Appendix B.

**Figure 1B.** Bland–Altman Plot of Sitting/Sedentary Time (Min/Day) as Assessed by IPAQ-SF and Accelerometer.

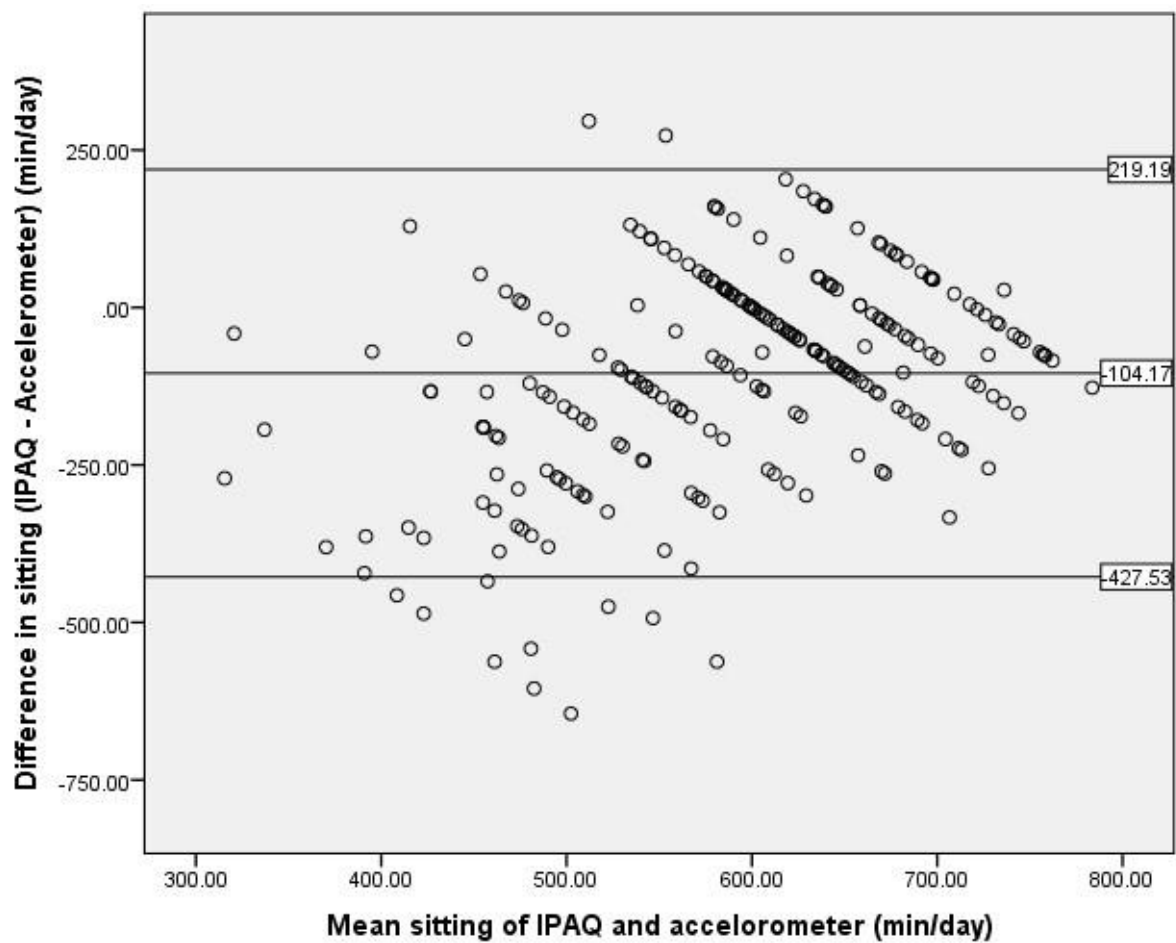

Supplement: Supplementary file 1 [file 13877858]
